1 **A spatial fingerprint of land-water linkage of biodiversity uncovered by**  
2 **remote sensing and environmental DNA**

3

4 Heng Zhang<sup>1,2,\*</sup>, Elvira Mächler<sup>1,2</sup>, Felix Morsdorf<sup>3</sup>, Pascal A. Niklaus<sup>1</sup>, Michael E.

5 Schaepman<sup>3</sup>, Florian Altermatt<sup>1,2,\*</sup>

6

7 **Author affiliation:**

8 <sup>1</sup> Department of Evolutionary Biology and Environmental Studies, University of Zurich,  
9 Winterthurerstr. 190, CH-8057 Zürich, Switzerland.

10 <sup>2</sup> Eawag, Swiss Federal Institute of Aquatic Science and Technology, Department of  
11 Aquatic Ecology, Überlandstrasse 133, CH-8600 Dübendorf, Switzerland.

12 <sup>3</sup> Remote Sensing Laboratories, Department of Geography, University of Zurich,  
13 Winterthurerstrasse 190, CH-8057 Zurich, Switzerland.

14

15 **\* Corresponding authors:**

16 Florian.Altermatt@ieu.uzh.ch and Heng.Zhang@eawag.ch

17 **Abstract**

18 Aquatic and terrestrial ecosystems are tightly connected via spatial flows of  
19 organisms and resources. Such land-water linkages integrate biodiversity across  
20 ecosystems and suggest a spatial association of aquatic and terrestrial biodiversity.  
21 However, knowledge about this spatial extent is limited. By combining satellite remote  
22 sensing (RS) and environmental DNA (eDNA) extraction from river water across a 740-  
23 km<sup>2</sup> mountainous catchment, we identify a characteristic spatial land-water fingerprint.  
24 Specifically, we find a spatial association of riverine eDNA diversity with RS spectral  
25 diversity of terrestrial ecosystems upstream, peaking at a 400 m distance yet still  
26 detectable up to a 3.3 km radius. Our findings testify that biodiversity patterns in rivers  
27 can be linked to the functional diversity of surrounding terrestrial ecosystems and  
28 provide a dominant scale at which these linkages are strongest. Such spatially explicit  
29 information is necessary for a functional understanding of land-water linkages and  
30 provides a reference scale for adequate conservation and landscape management  
31 decisions.

32

## 33 **1. Introduction**

34           Understanding the spatial distribution of biodiversity and its linkage across  
35 ecosystem types is essential, especially in an era of increasing human modifications of  
36 natural landscapes<sup>1,2</sup>. It is well-established that species and ecosystem functional  
37 diversity are unevenly distributed across landscapes, with pronounced diversity hot and  
38 cold spots<sup>3,4</sup>. Extensive work has also demonstrated how ecosystems more diverse in  
39 species are more productive and stable<sup>5-7</sup>. Intriguingly, however, most past work has  
40 focused on individual ecosystem types, such as forests, grasslands, or aquatic  
41 ecosystems, thereby neglecting a possible co-variation of biodiversity across different  
42 ecosystems<sup>8</sup>. Indeed, only very recently the relevance of spatial scaling of biodiversity  
43 and ecosystem functioning research and the dependence on the spatial extent has been  
44 postulated<sup>9,10</sup>

45           Natural ecosystems, and the biodiversity therein, are often linked to each other  
46 through flows of organisms and resources<sup>11,12</sup>. One of the most prominent examples is  
47 the coupling of aquatic to terrestrial ecosystems<sup>13,14</sup>. Aquatic ecosystems are not only  
48 highly biodiverse yet threatened by anthropogenic activities<sup>15,16</sup>, but also strongly  
49 interlinked with surrounding terrestrial ecosystems through the characteristic fractal  
50 structure of riverine networks across most landscapes worldwide<sup>17,18</sup>. Consequently, in  
51 these systems, the interaction of one ecosystem resulting in an imprint on the diversity  
52 of the other ecosystem is expected, with implications for land management and  
53 conservation. Nevertheless, little is known about the occurrence and extent of such

54 imprints, particularly regarding the spatial range at which such an interaction modulates  
55 local biodiversity.

56 To assess possible spatial linkages of diversity across ecosystem types,  
57 biodiversity must be quantified in scalable manners. Classically, biodiversity is directly  
58 quantified by counting individual species, for example, through inventories conducted  
59 along transects or in plots of defined size. This approach, however, is inherently limited  
60 for spatial upscaling and cross-ecosystem comparisons<sup>9</sup>. Currently, two recent  
61 technological advances are revolutionizing biodiversity sciences, overcoming limitations  
62 with taxonomic and functional coverage, and the possibility to be spatially scaled. The  
63 first advancement is through remote sensing (RS) methods, which use portable,  
64 airborne, or satellite devices to characterize the ecosystem structurally, taxonomically,  
65 or physiologically by measuring reflected or emitted radiation at a distance<sup>19-21</sup>. RS is  
66 particularly capable of characterizing terrestrial plant communities and a prime method  
67 for measuring essential biodiversity variables (EBVs)<sup>19-21</sup>. Particularly, RS can map  
68 terrestrial ecosystem functional traits and diversity at regional to global scales with  
69 resolutions down to a meter, enabling the upscaling of biodiversity from local  
70 composition to ecosystem levels<sup>22-25</sup>. The second advancement is through  
71 environmental DNA (eDNA) metabarcoding, which uses DNA extracted from  
72 environmental samples to quantify biodiversity across the tree of life<sup>26-30</sup>. eDNA  
73 metabarcoding is widely used in aquatic ecosystem studies, where it is becoming a  
74 standard for biodiversity assessments<sup>31-36</sup>. The passive transport of DNA in water makes  
75 it a particularly efficient method in riverine systems, as the flow along the riverine

76 network carries and integrates biodiversity information over the catchment <sup>37-40</sup>, and  
77 can be used for estimating spatial patterns of biodiversity at the landscape level <sup>41,42</sup>.

78       Essentially, RS and eDNA metabarcoding complement each other in biodiversity  
79 detection. eDNA can detect bacteria, invertebrates, and vertebrates that are largely  
80 inaccessible for RS, while RS can monitor ecosystem physiological and structural  
81 diversity impossible to draw from eDNA data. Therefore, a combination of RS and eDNA  
82 can provide a holistic view of biodiversity for isolated and mosaicked ecosystems <sup>43,44</sup>  
83 and allows to uncover land-water linkages of biodiversity at the landscape level <sup>45,46</sup>.

84       Here, we quantified the spatial extent of a linkage of biodiversity between  
85 aquatic and terrestrial ecosystems by combining eDNA sampling and RS in a 740-km<sup>2</sup>  
86 river drainage basin. We assessed aquatic biodiversity along the river network using  
87 eDNA and matched it to terrestrial ecosystem functional diversity in the catchment  
88 based on Sentinel-2 Multi-Spectral Instrument (MSI) satellite data. Specifically, we  
89 identified the spatial range within which the functional diversity of the terrestrial  
90 vegetation was associated with the taxonomic diversity in the riverine ecosystems and  
91 determined at what spatial scale this linkage was the highest. Thereby, combining eDNA  
92 and RS, we provide a first spatially explicit integration of land-water linkage of  
93 biodiversity, and identify a characteristic spatial fingerprint across aquatic-terrestrial  
94 ecosystem boundaries at the landscape level.

95

96

97

## 98 2. Results

99 We combined assessments of aquatic biodiversity using eDNA and terrestrial diversity  
100 based on Sentinel-2 Multi-Spectral Instrument (MSI) satellite data in the 740 km<sup>2</sup> river  
101 Thur catchment (Fig. 1). The river Thur catchment is located in the northeastern part of  
102 Switzerland. It covers a mountainous landscape with an elevation gradient ranging from  
103 460 m to 2423 m a.s.l. and contains a mosaicked landscape of urban, agricultural and  
104 forested terrestrial ecosystem types.

105

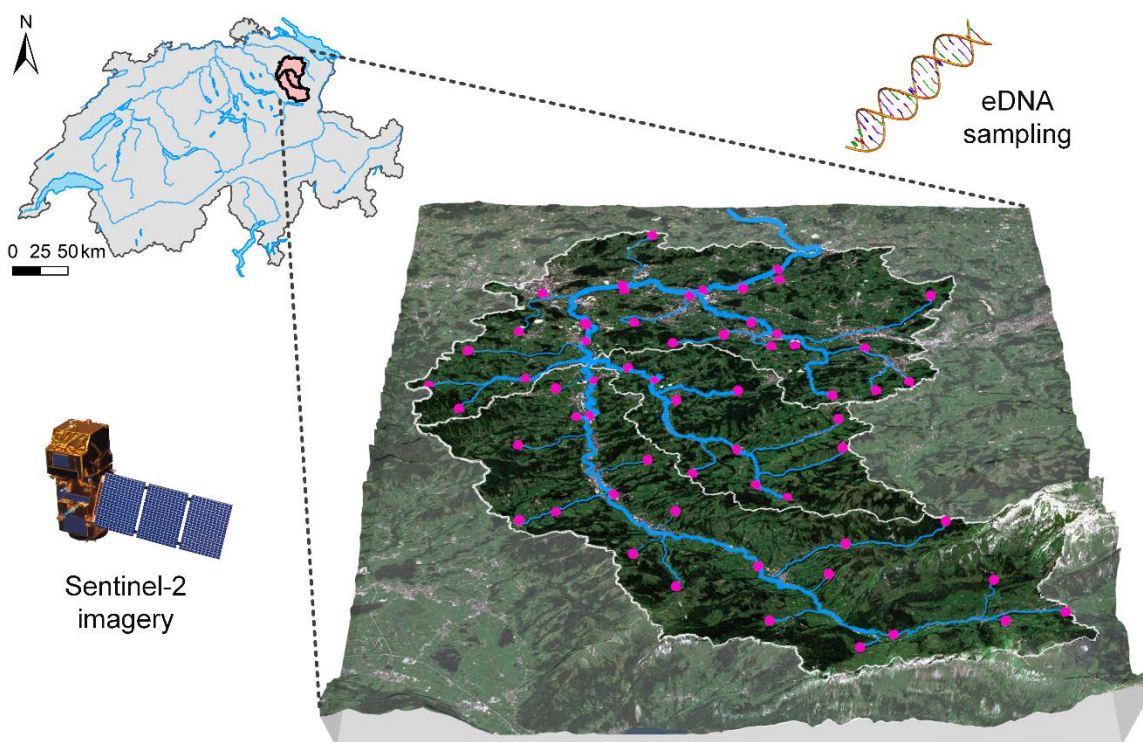

106

107 **Fig. 1 Location of the Thur river catchment in Switzerland and eDNA sampling sites.**

108 Pink dots are 61 eDNA sampling sites. The blue lines represent river channels draining in  
109 a Northward direction. White lines indicate the boundaries of the main catchment and  
110 its three subcatchments (Thur, Glatt, and Necker).

111

112 **eDNA-derived biodiversity in aquatic ecosystem.** We conducted eDNA water sampling  
113 at 61 sites along the river network, representatively covering the whole 740 km<sup>2</sup>  
114 catchment (Fig. 1). All water samples were filtered, the DNA extracted, and sequenced  
115 using generic COI-specific primers targeting a broad range of pro- and eukaryotic  
116 organisms. Detailed procedures are described in the Methods section and in Mächler *et*  
117 *al.*, 2019 and 2021<sup>47,48</sup>. We received a total of 26,519,031 reads that were clustered into  
118 10,962 zero-radius operational taxonomic units (ZOTUs) with 2404 ± 216 (mean ±  
119 standard error) number of reads per ZOTU as a proxy of taxonomic diversity.

120 To describe different aspects of biodiversity across all eDNA samples, we used  
121 Hill numbers, which are a compatible statistical framework considering both occurrence  
122 and abundance information<sup>48-51</sup>. In this framework, the evenness of biodiversity  
123 patterns gets more weight with increasing Hill number *q* orders. Here, we calculated Hill  
124 numbers with order *q* = 0, 1, and 2, which correspond to species richness, the  
125 exponential of Shannon diversity, and the inverse of the Simpson index, respectively  
126 (see Methods, Fig. 2), after removing very rare ZOTUs (occurrence < 0.005% in total, see  
127 details in Methods section). We observed strong and highly uneven biodiversity patterns  
128 across the catchment, with a strong and significant positive correlation between  
129 biodiversity and Strahler order (Fig. S1 a-c; *p*-value < 0.05), and a decreasing trend of  
130 biodiversity at increasing elevation (Fig. S1 d-f).



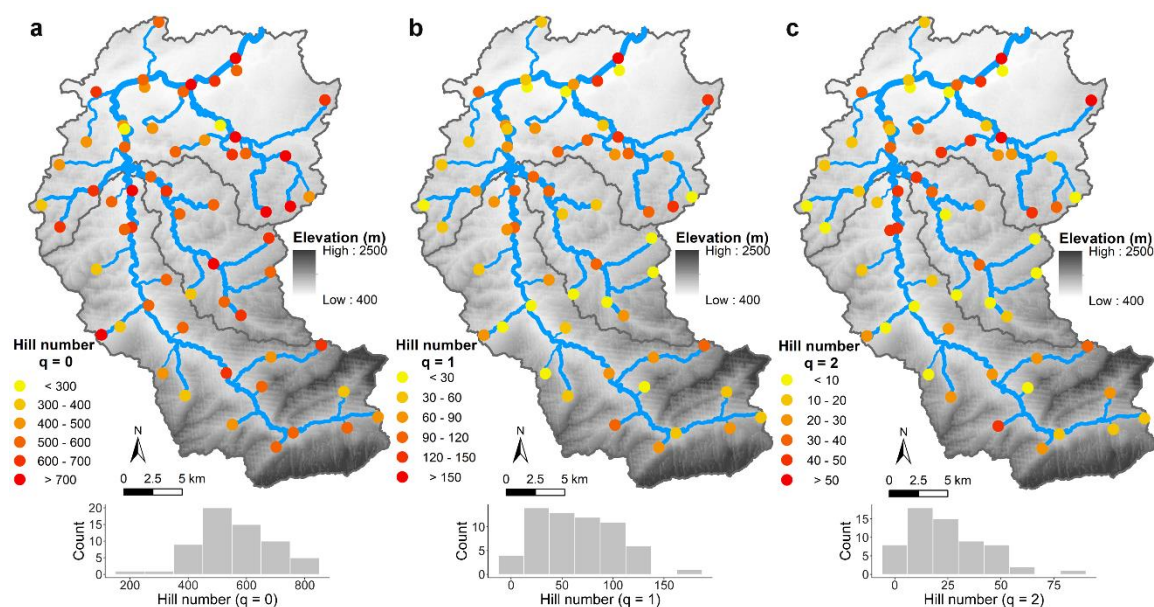

131

132 **Fig. 2 Distribution of biodiversity in Thur river catchment.** Hill numbers were used to

133 describe biodiversity of eDNA samples in the river network. Spatial patterns and

134 histograms on distribution of diversity using Hill numbers with order **a**  $q = 0$ , **b**  $q = 1$ , and

135 **c**  $q = 2$  are given. They correspond to species richness (order  $q = 0$ ), the exponential of

136 Shannon diversity (order  $q = 1$ ), and the Simpson index (order  $q = 2$ ), respectively.

137

138 **RS-derived physiological traits and functional diversity in terrestrial ecosystems.** We

139 adapted a spatially continuous method, which was generalized to Sentinel-2 MSI

140 satellite data, to map the terrestrial ecosystem functional diversity (a metric in EBVs) at

141 a  $20 \times 20$  m resolution<sup>22,52,53</sup>. We used chlorophyll content (CHL), anthocyanin content

142 (ANT), carotenoid content (CAR), and water content (WAT) to represent four

143 physiological trait dimensions (see Methods) as direct proxies of functional diversity

144 (Fig. 3). These spectral components capture plant physiological traits that integrate



145 different components of terrestrial ecosystem functions, and thus functional diversity,  
146 related to the presence and conditions of vegetation <sup>52,54</sup>.

147

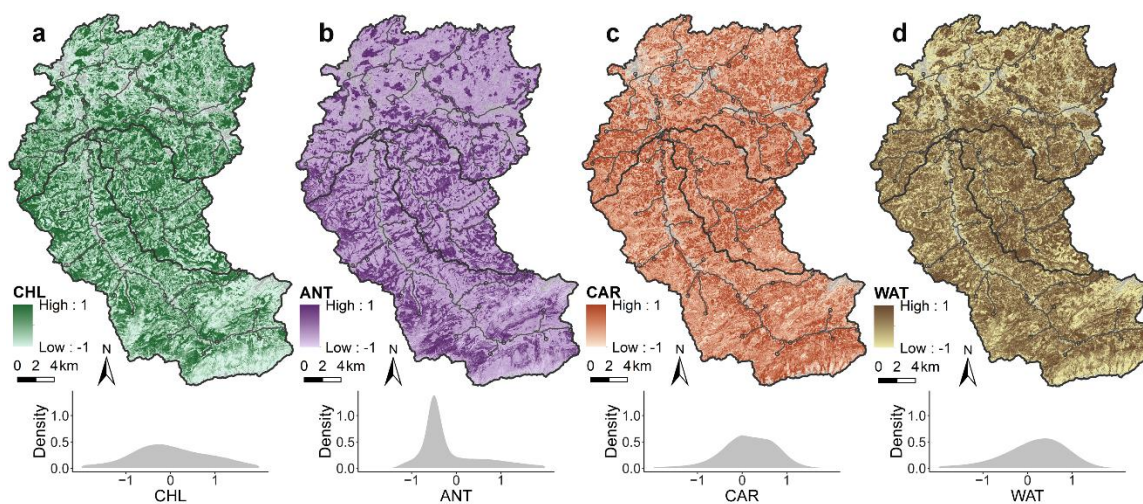

148

149 **Fig. 3 Functional trait diversity assessed through physiological trait characteristics of**  
150 **the terrestrial landscape in the Thur river catchment. a** Map and density plot of  
151 chlorophyll content (CHL), represented by the red-edge chlorophyll index ( $Cl_{re}$ ). **b** Map  
152 and density plot of anthocyanin content (ANT), represented by the anthocyanin  
153 reflectance index 1 ( $ARI1$ ). **c** Map and density plot of carotenoid content (CAR),  
154 represented by the plant senescence reflectance index ( $PSRI$ ). **d** Map and density plot of  
155 water content (WAT), represented by the normalized difference infrared index ( $NDII$ ).  
156 Non-vegetated pixels were masked out (grey area), and all traits were normalized.

157

158 For each sampling site, we produced a catchment map based on the digital  
159 elevation model (DEM) and created distance buffers with spatial intervals, within which  
160 functional divergence (FDiv) was calculated (Fig. 4, see Methods section). The mean

161 value of FDiv ( $\pm$  standard deviation (SD)) across distance is  $0.665 (\pm 0.025)$ . As the  
162 distance increased, the range of FDiv dropped from 0.216 (distance = 50 m) to 0.049  
163 (distance = 20 km).  
164

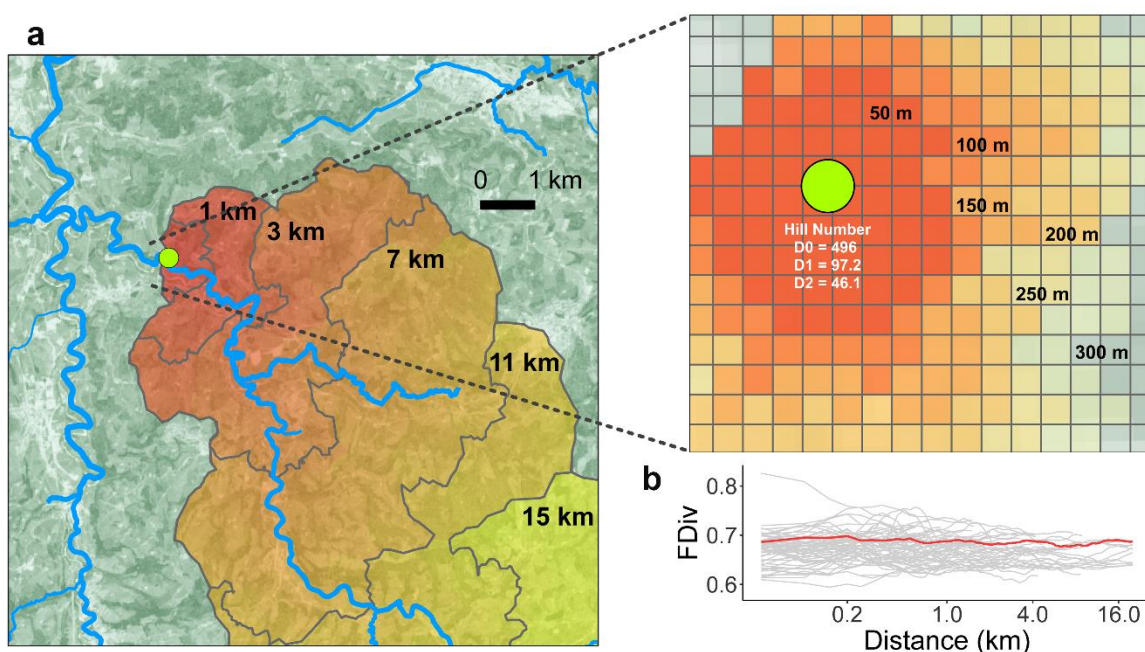

165  
166 **Fig. 4 Spatial distribution of terrestrial ecosystem functional diversity based on**  
167 **catchment and distance buffers of the eDNA sampling site. a** Catchment map with  
168 distance buffers of site No. 28 as an example. The spatial interval is 0.05 km for 0–10 km  
169 and 0.1 km for 10–20 km. **b** Functional divergence (FDiv) with upstream distance given  
170 for 61 eDNA sampling sites (grey lines; the example site No. 28 is highlighted as red  
171 line). We calculated FDiv by collecting four-dimensional trait value vectors from pixels  
172 covered by the distance buffer (for details and equations, see Methods section). Non-  
173 vegetated pixels were masked out before computation.

174

175 **The land-water linkage of biodiversity.** We employed a model II simple linear  
176 regression to assess the association between eDNA-derived biodiversity (Hill numbers)  
177 and the RS-derived terrestrial ecosystem functional diversity (FDiv) across distance,  
178 using  $R^2$  as the goodness of fit. Uncertainties were estimated by a bootstrap framework  
179 (see Methods for details).

180         The linear regression analysis reveals a unimodal association between the eDNA-  
181 based (aquatic) Hill numbers and the RS-based (terrestrial) FDiv as the upstream  
182 distance to sampling sites increases, with a linkage signal of up to 3.3 km radius  
183 upstream (Fig. 5). The distances with the highest  $R^2$  (distance with maximal land-water  
184 imprint) vary across orders of  $q$ . For  $q = 0$ , this distance with the strongest imprint is 400  
185 m; for  $q = 1$ , it is 350 and 800 m, respectively; for  $q = 2$ , it is 350 and 850 m, respectively.  
186 The strong effect of ZOTU-level richness decreases with increasing Hill number (Fig. 5),  
187 suggesting that the rare taxa contribute most to the observed land-water linkage.  
188 Possibly, this could be ascribed to the decreasing contributions from the less abundant  
189 taxonomic groups after increasing the weight of abundance (increasing Hill number  
190 order  $q$ ), as an abundant taxonomic group may swamp the effect of the less abundant  
191 ones. In addition, it highlights the importance of rare taxa contributing to overall beta-  
192 diversity<sup>55</sup> and the negative effect of large-scale homogenization of biodiversity<sup>56</sup>,  
193 which results not only in an erosion of beta-diversity within one ecosystem but has also  
194 a cascading negative effect on other ecosystems.

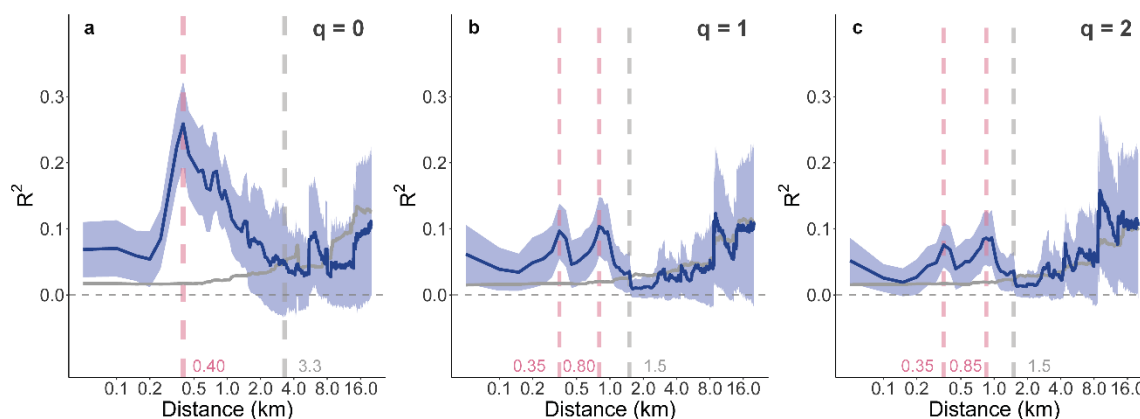

195

196 **Fig. 5 Association between eDNA-derived biodiversity assessed in the river water and**  
197 **RS-derived terrestrial ecosystem functional diversity across increasing upstream**  
198 **distance in the Thur river catchment.** The  $R^2$  of the linear regression ( $\pm$  standard  
199 deviation, blue lines) between eDNA-based Hill numbers with order **a**  $q = 0$ , **b**  $q = 1$ , and  
200 **c**  $q = 2$ , and RS-based functional divergence (FDiv) across distance are given. The  $R^2$  of  
201 the null models is shown in grey lines.

202

203 We developed null models to corroborate the robustness of the observed spatial  
204 extent of the land-water linkage, by randomly shuffling the locations of all pixels within  
205 the river catchment. Then, we assessed whether and at what spatial extent such a land-  
206 water linkage of biodiversity exists in a null-model scenario (see Methods). We found  
207 that the  $R^2$  of our sampling was always greater than the null model for distances  $< 3.3$   
208 km for  $q = 0$ ,  $< 1.5$  km for both  $q = 1$  and 2, respectively (Fig. 5). These results testify that  
209 biodiversity in riverine ecosystems can be linked to the functional diversity of  
210 surrounding terrestrial ecosystems, with the strongest association occurring at a spatial  
211 extent of several hundred meters.

212 To disentangle the observed land-water linkage of biodiversity, we mapped the  
213 ZOTUs against a customized MIDORI Reference 2 database for taxonomic information,  
214 which allowed us to identify the taxonomic affiliation of the most prominent ZOTUs and  
215 read numbers at phylum and class level, respectively (Fig. 6). Abundant affiliations both  
216 with respect to ZOTU richness and read numbers were found for Arthropods (especially  
217 Insecta), Ascomycota (a fungi phylum), and Bacillariophyta (i.e., diatoms), and ZOTUs  
218 across all groups originated from organisms inhabiting both aquatic and terrestrial  
219 environments (Fig. 6). We subsampled the eDNA data based on the taxonomic  
220 information to evaluate individual contributions across major taxonomic groups.  
221 Specifically, we calculated the relative abundances at the phylum level and assessed  
222 their associations with FDiv across distance. Among all the major taxonomic groups, we  
223 detected strong associations in Bacillariophyta, Chordata, Ascomycota, Cnidaria,  
224 Rotifera, Amoebozoa, Chlorophyta, Cryptophyta, and Porifera, although the spatial  
225 extents were varying (Fig. S2). Importantly, these results show that the land-water  
226 linkage of biodiversity included contributions of aquatic and terrestrial origins, thus  
227 reflecting both an integrated signal of biodiversity across ecosystems and a signal of  
228 local ecosystem biodiversity.  
229

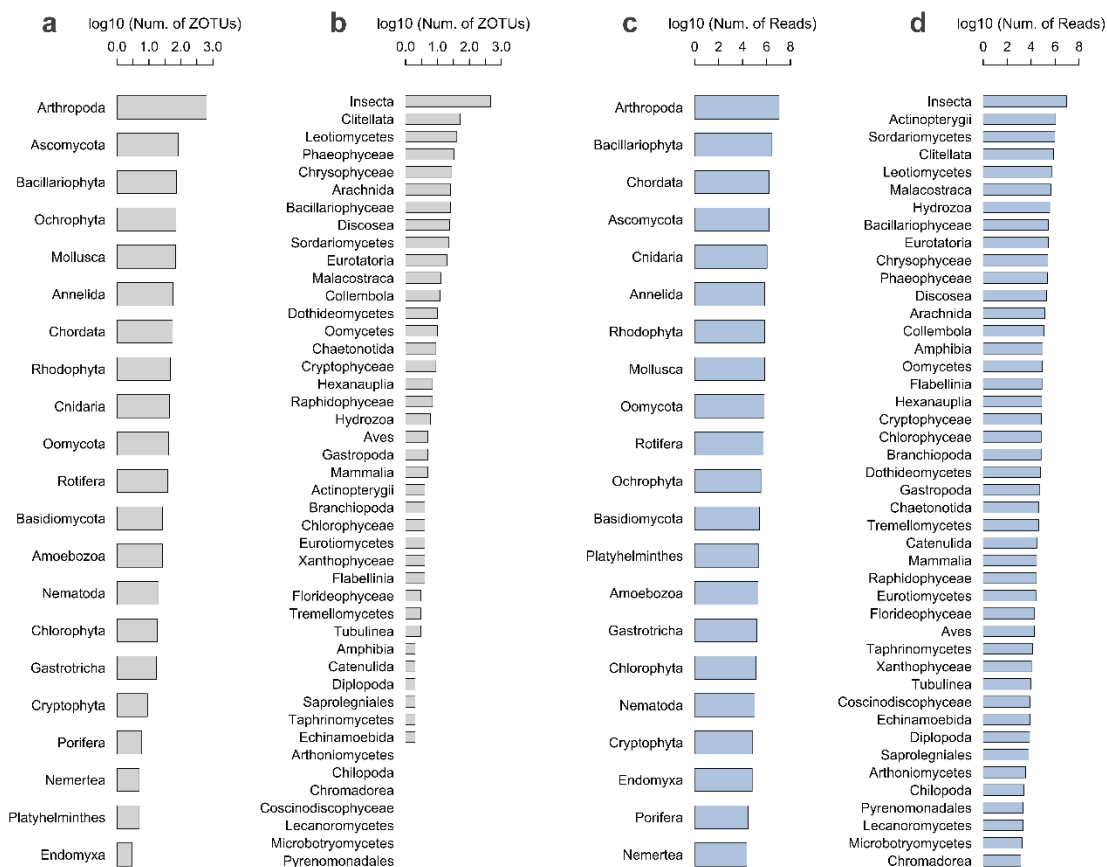

230

231 **Fig. 6** Number of ZOTUs and reads in the eDNA data. **a** Number of ZOTUs at the phylum

232 level. **b** Number of ZOTUs at the class level. **c** Number of reads at the phylum level. **d**

233 Number of reads at the class level. ZOTUs with occurrences less than three at the

234 phylum level were removed to avoid spurious effects. All numbers were log<sub>10</sub>-

235 transformed before plotting. The taxonomic information of eDNA data indicates a

236 combination of aquatic and terrestrial origins.

237

238

239

240

241 **3. Discussion**

242 Combining eDNA sampling and multispectral remote sensing imagery (Fig. 1), we  
243 demonstrated a spatial association of biodiversity between aquatic and terrestrial  
244 ecosystems and gave a spatially explicit quantification of its peak strength, peaking  
245 across a catchment section at a 400 m radius upstream around the aquatic sampling site  
246 (Fig. 5). Overall, the unimodal signal of the land-water linkage of biodiversity covers a  
247 range of up to 3.3 km upstream, indicating that a place in a river and surrounding  
248 terrestrial ecosystems are closely interlinked, with a tight connection in terms of  
249 biodiversity. Furthermore, for the first time, we provide a specific and scalable approach  
250 to quantify the spatial extent of such linkages across ecosystems types and identify a  
251 characteristic spatial land-water fingerprint.

252 The characterization of the terrestrial ecosystems from a biodiversity perspective  
253 was based on multiple physiological trait dimensions (Fig. 3), capturing major  
254 components of the dominant vegetation cover. Contrary to traditional biodiversity  
255 surveys and estimates, which are often limited to small scales and numbers of sites and  
256 depend on specific taxonomic knowledge, our approach using high-resolution satellite  
257 RS data is not only capable of depicting regional and spatially continuous characteristics  
258 of biodiversity, but can be directly applied and scaled to map terrestrial biodiversity  
259 across all river catchments worldwide. Additionally, the characterization of aquatic  
260 biodiversity using eDNA allows a scaling across space and time, and most importantly,  
261 does not depend on prior knowledge on the occurrence of specific taxa. Thereby, this  
262 eDNA and RS combination approach could contribute to a global understanding of



263 biodiversity patterns. Our method can, in principle, be applied and transferred to all  
264 land-water ecosystems worldwide, and may be especially useful to uncover biodiversity  
265 patterns in understudied regions, such as regions beyond Europe and North America.

266 In this study, we identified a strong fingerprint of land-water linkage of  
267 biodiversity, with a metric of terrestrial ecosystem functional diversity developed on a  
268 combination of four physiological trait components of vegetation. These four  
269 physiological traits are proved to be able to capture major ecosystem functions of  
270 vegetation<sup>52</sup>. To evaluate the relative individual importance of these components,  
271 namely CHL, CAR, ANT, and WAT, we removed one dimension at each time and  
272 repeated the calculation process. We found that the maximum values of  $R^2$  dropped  
273 remarkably when CHL or WAT was removed (Fig. S3 & Tab. S1). Moreover, the unimodal  
274 shape was flatter after both CHL and WAT were removed (Fig. S4 & Tab. S1). These  
275 indicate that CHL and WAT, inherently representing the photosynthesis activity of  
276 vegetation and thus a proxy of productivity, mainly characterize the spatial fingerprint  
277 of land-water linkage of biodiversity.

278 For the characterization of the aquatic biodiversity (Fig. 2), we used a generic COI  
279 marker amplifying eDNA signals across a wide range of taxa, yet predominantly used to  
280 target invertebrates. Although a large proportion of retrieved sequences aligned with  
281 macro-and micro-invertebrates, we covered a wider breadth of taxa regarding ZOTUs,  
282 including microbes and vertebrates. Because the coverage of these organisms is highly  
283 variable in the respective reference databases<sup>57</sup>, we applied a taxonomy-free approach  
284 using ZOTUs only to not depend on such databases. This approach covers a broader

285 taxonomic breadth yet does not address the contribution of individual taxonomic  
286 groups. Still, according to the taxonomic information of our eDNA data (Fig. 6), we  
287 observed that ZOTUs originated from aquatic and terrestrial environments both  
288 contributed to the land-water linkage of biodiversity. Then, we also evaluated the  
289 relative contribution of each of the major taxonomic groups at the phylum level to the  
290 spatial land-water fingerprint by omitting one of these major taxonomic groups at a  
291 time and repeating the calculations. Intriguingly, the association pattern was almost the  
292 same regardless of which taxonomic group was omitted (Fig. S5), suggesting that the  
293 land-water fingerprint of biodiversity is highly robust and thus does not depend on a  
294 single major organismal group.

295       Importantly, the unimodal shape of the linkage of biodiversity was not caused by  
296 variations of vegetation productivity, suggesting that the heterogeneity and not the  
297 productivity of terrestrial ecosystems contributes to local aquatic biodiversity. We  
298 tested this by firstly calculating the enhanced vegetation index (EVI) to represent  
299 vegetation productivity<sup>58</sup>. Then, we adopted type I ANOVA tests to evaluate the relative  
300 contributions of EVI and FDiv to the Hill numbers across distance (see Methods; Fig. S6).  
301 In addition, we also found that EVI and FDiv were not correlated at distances < 8.0 km  
302 (Fig. S7). Together, this evidences that the unimodal signal of land-water linkage of  
303 biodiversity cannot be ascribed to variations of vegetation productivity.

304       The methodology to assess the spatial fingerprint of land-water linkage of  
305 biodiversity proved to be an efficient way to uncover an underlying picture of  
306 biodiversity in spatially coupled ecosystems, by combining *in situ* measures of eDNA and

307 regional data of RS. Both eDNA metabarcoding and RS are capable of assessing  
308 biodiversity across scales because of easy access to vast quantities of information with  
309 high robustness and accuracy, non-invasive and standardized procedures, and relatively  
310 low costs<sup>59-63</sup>. Therefore, the methods applied here can contribute to next-generation  
311 biodiversity monitoring at regional to global scales<sup>64</sup>.

312         The spatial fingerprint of land-water linkage of biodiversity detected is robust  
313 and may be even more resolved when the spatio-temporal matching of the two  
314 approaches is increased. Our study adopted Sentinel-2 MSI Level-2A bottom of  
315 atmosphere reflectance for RS measurements. It was generated on Level-1C top of  
316 atmosphere reflectance and is less affected by clouds or aerosols. Therefore, it is more  
317 accurate in mapping the physiological traits of vegetation. Due to the lack of Level-2A  
318 reflectance in 2016, we used Level-2A reflectance in 2017 for calculation in order to  
319 match the eDNA sampling at the respective seasonal time point. While there is likely  
320 seasonality in both RS and eDNA data<sup>65,66</sup>, the inter-annual variation in RS between  
321 2016 and 2017 is relatively minor, being testified by a very high correlation of  
322 corresponding bands and physiological trait indices on Level-1C data between 2016 and  
323 2017 (Tab. S2 & S3). Additionally, the meteorological conditions were very similar  
324 between 2016 and 2017, and both years were close to the normal condition in terms of  
325 temperature and precipitation (Tab. S4). Thus, the spatial fingerprint is robust across  
326 years, at least when the land cover and meteorological conditions are not changing. In  
327 reverse, the method may be directly applicable to detecting land-use changes, as a  
328 change in the magnitude and extent of the spatial fingerprint may be expected.

329 In conclusion, we uncovered a spatially explicit land-water linkage of biodiversity  
330 in a large mountainous catchment by using eDNA sampling and satellite remote sensing  
331 imagery. The linkage of biodiversity between rivers and surrounding terrestrial  
332 landscapes covers a section in the catchment with a radius of around 3 km, with a  
333 maximum at 400 m, identifying a characteristic fingerprint of land-water linkage of  
334 biodiversity in spatially coupled ecosystems. While developed in a mountainous region  
335 with different major land cover types, including forest, grassland, agriculture, and urban  
336 areas, our method does not depend on specific organismal groups, thus can be used for  
337 all regions with mosaicked land cover types, providing a globally applicable basis for  
338 biodiversity conservation and land management.

339

340

#### 341 **4. Methods**

342 **eDNA sampling in the Thur river network.** The Thur catchment covers an area of 740  
343 km<sup>2</sup> with three main river branches (Thur, Glatt, and Necker) and the main land covers  
344 including forest (29.0%), arable and grassland (56.0%), urban area (10.2%), unproductive  
345 land (3.6%), and water (1.2%) land types (data from Swiss Federal Statistical Office,  
346 2015. website: [https://www.bfs.admin.ch/bfs/en/home/services/geostat/swiss-federal-](https://www.bfs.admin.ch/bfs/en/home/services/geostat/swiss-federal-statistics-geodata/land-use-cover-suitability/swiss-land-use-statistics/land-use.html)  
347 [statistics-geodata/land-use-cover-suitability/swiss-land-use-statistics/land-use.html](https://www.bfs.admin.ch/bfs/en/home/services/geostat/swiss-federal-statistics-geodata/land-use-cover-suitability/swiss-land-use-statistics/land-use.html)). A  
348 systematic eDNA sampling was conducted in June 2016 under base-flow conditions. The  
349 detailed sampling, laboratory work, and subsequent bioinformatic analyses are  
350 described in Mächler *et al.*, 2019 and 2021<sup>47,48</sup>, who mostly analyzed the dataset with

351 respect to the diversity of a small subset of all organisms and methodological details of  
352 the eDNA sampling, respectively. In total, we collected 183 water samples at 61 sites  
353 (three individual replicates per site) in the dendritic river network. For each replicate,  
354 250 ml of river water was filtered on site using GF/F filters (pore size 0.7  $\mu$ m Whatman  
355 International Ltd.), and the filters were then immediately stored at -20 °C. Subsequently,  
356 DNA was extracted in a specifically dedicated clean lab, using the DNeasy Blood and  
357 Tissue Kit (Qiagen GmbH). Handling and extraction of all replicates were done in a  
358 randomized order. We performed two PCR runs with the Illumina MiSeq dual-barcoded  
359 two-step PCR amplicon sequencing protocol by targeting a short barcode region of the  
360 cytochrome c oxidase I (COI) <sup>67</sup>. We used primers containing an Illumina adaptor-specific  
361 tail, a heterogeneity spacer, and the amplicon target site in the first run, and the  
362 Nextera XT Index Kit v2 for indexing in the second run. Filter controls (FC), extraction  
363 controls (EC), positive and negative PCR controls (PC, NC) were run alongside. The  
364 sequence data were subsequently demultiplexed, and the quality of the reads was  
365 checked with FastQC <sup>68</sup>. Then, we end-trimmed (usearch, version 10.0.240), merged the  
366 raw reads (Flash, version 1.2.11), removed primer sites (cutadapt, version 1.12), and  
367 quality-filtered the data (prinseq-lite, version 0.20.4). Next, we used UNOISE3 (usearch,  
368 version 10.0.240) to determine ZOTUs, and performed an additional clustering at 99%  
369 sequence identity to reduce sequence diversity. Before final use, the resulting ZOTUs  
370 were checked for stop codons with invertebrate mitochondrial code, and to only contain  
371 an intact open reading frame.

372 We merged the ZOTU abundances of the three replicates at each site and got  
373 26,519,031 reads clustered into 10,962 ZOTUs. Then, we calculated the relative  
374 abundance for each ZOTU at all sampling sites. To alleviate uncertainties, we filtered out  
375 the ZOTUs with less than 0.005% occurrence in total (i.e., <1326 total reads) and finally  
376 used 24,471,930 reads clustered into 1,394 ZOTUs for all analyses. Taxonomic  
377 information at the phylum and the class level for all ZOTUs was acquired by mapping  
378 against a customized MIDORI Reference 2 (UNIQ/GB242) database. After that, we  
379 computed relative abundance for each ZOTU at each site, subsequently referred to as  
380 our eDNA data.

381

382 **Hill numbers as metrics of eDNA-derived biodiversity.** We used Hill numbers as a  
383 scalable metric to describe eDNA-derived biodiversity estimates. Hill numbers are a  
384 compatible statistical framework that integrates diversity concepts by considering  
385 incidence and abundance data. They have been widely used as metrics for eDNA-based  
386 biodiversity calculation because biodiversity measurements between diversity levels or  
387 studies can be directly compared to each other<sup>48-51</sup>. Based on the acquired eDNA data  
388 set, we calculated Hill numbers at each sampling site with order  $q = 0, 1,$  and  $2$   
389 according to equations (1–2), which are analogue to species richness, the exponential of  
390 Shannon diversity, and the inverse of the Simpson index, respectively<sup>48</sup>. For  $q = 1,$  there  
391 is a singularity problem for the equation; therefore, equation (2) was used instead.

392 
$${}^qD = \left( \sum_{i=1}^s p_i^q \right)^{1/(1-q)}, \quad (q \neq 1). \quad (1)$$

393 
$${}^1D = \exp\left(-\sum_{i=1}^s p_i \cdot \ln p_i\right), \quad (q = 1). \quad (2)$$

394 Here,  $s$  is the number of ZOTUs at each site,  $p_i$  is the relative abundance of ZOTU  $i$ .

395

396 **Physiological traits in terrestrial ecosystems by Sentinel-2.** We used Sentinel-2 derived  
397 measures to describe the functional diversity of the terrestrial ecosystems. We adapted  
398 a method developed by Helfenstein, 2018<sup>52</sup>, which successfully applied the terrestrial  
399 ecosystem functional diversity mapping<sup>22</sup> to Sentinel-2 MSI data, to map physiological  
400 traits at a 20-m resolution and then calculate terrestrial ecosystem functional diversity  
401<sup>53</sup>. Specifically, we used chlorophyll content (CHL), anthocyanin content (ANT),  
402 carotenoid content (CAR), and water content (WAT) to construct a four-dimensional  
403 functional space. Chlorophyll (green pigment) helps plants capture energy from light in  
404 the photosynthesis reaction; anthocyanin (blue, red, and purple pigment) replaces  
405 chlorophyll during leaf senescence process; carotenoid (orange and yellow pigment)  
406 prevents possible damage in stress conditions; water content reflects dry weight and  
407 drought stress among the plants<sup>25</sup>. Hence, these traits can integrally capture the  
408 presence and conditions of vegetation<sup>52</sup>.

409 All physiological traits were computed on Google Earth Engine (GEE), a cloud-  
410 based platform for spatial analysis<sup>69</sup>. We selected Sentinel-2 MSI Level-2A calibrated  
411 surface reflectance (SR) image collections between June and August in 2017, as no SR  
412 images were produced at the time of eDNA sampling. Based on a cloud-free image



413 acquired by employing a median filter to the selected image collections, we calculated  
414 ten indices of CHL, ANT, CAR, and WAT.

415 1) **CHL**: the red-edge chlorophyll index ( $CI_{re}$ , equation 3), the green chlorophyll index  
416 ( $CI_g$ , equation 4), the Medium Resolution Imaging Spectrometer (MERIS) terrestrial  
417 chlorophyll index ( $MTCI$ , equation 5), and the normalized difference red-edge 1 and 2  
418 ( $NDRE1$  and  $NDRE2$ , equations 6–7).

$$419 \quad CI_{re} = \frac{\rho_{773-793}}{\rho_{698-713}} - 1 = \frac{B7}{B5} - 1. \quad (3)$$

$$420 \quad CI_g = \frac{\rho_{773-793}}{\rho_{543-578}} - 1 = \frac{B7}{B3} - 1. \quad (4)$$

$$421 \quad MTCI = \frac{\rho_{733-748} - \rho_{698-713}}{\rho_{698-713} + \rho_{650-680}} = \frac{B7 - B5}{B5 - B4}. \quad (5)$$

$$422 \quad NDRE1 = \frac{\rho_{733-748} - \rho_{698-713}}{\rho_{733-748} + \rho_{698-713}} = \frac{B6 - B5}{B6 + B5}. \quad (6)$$

$$423 \quad NDRE2 = \frac{\rho_{773-793} - \rho_{698-713}}{\rho_{773-793} + \rho_{698-713}} = \frac{B7 - B5}{B7 + B5}. \quad (7)$$

424 2) **ANT**: the anthocyanin reflectance index 1 and 2 ( $ARI1$  and  $ARI2$ , equations 8–9), and  
425 the red-green ratio ( $RGR$ , equation 10).

$$426 \quad ARI1 = \frac{1}{\rho_{543-578}} - \frac{1}{\rho_{698-713}} = \frac{1}{B3} - \frac{1}{B5}. \quad (8)$$

$$427 \quad ARI2 = \frac{\rho_{785-900}}{\rho_{458-523}} - \frac{\rho_{785-900}}{\rho_{543-578}} = \frac{B8}{B2} - \frac{B8}{B3}. \quad (9)$$

$$428 \quad RGR = \frac{\rho_{650-680}}{\rho_{543-578}} = \frac{B4}{B3}. \quad (10)$$

429 3) **CAR**: the carotenoid reflectance index 1 ( $CRI1$ , 11), and the plant senescence  
430 reflectance index ( $PSRI$ , equation 12).

$$431 \quad CRI1 = \frac{1}{\rho_{458-523}} - \frac{1}{\rho_{543-578}} = \frac{1}{B2} - \frac{1}{B3}. \quad (11)$$

$$432 \quad PSRI = \frac{\rho_{650-680} - \rho_{543-578}}{\rho_{733-748}} \cdot (-1) = \frac{B4 - B3}{B6} \cdot (-1). \quad (12)$$

433 4) **WAT**: the normalized difference infrared index (*NDII*, equation 13).

$$434 \quad NDII = \frac{\rho_{785-900} - \rho_{1565-1655}}{\rho_{785-900} + \rho_{1565-1655}} = \frac{B8 - B11}{B8 + B11}. \quad (13)$$

435  $\rho_{XXX-XXX}$  and  $BX$  represent the band of Sentinel-2 MSI.

436 To remove urban and water areas, we calculated the normalized difference  
 437 vegetation index (*NDVI*, equation 14), and then masked out the non-vegetated pixels  
 438 by setting a criterion of  $NDVI < 0.4$ .

$$439 \quad NDVI = \frac{\rho_{785-900} - \rho_{650-680}}{\rho_{785-900} + \rho_{650-680}} = \frac{B8 - B4}{B8 + B4}. \quad (14)$$

440 All the calculated indices were re-projected to the CH1903 projection.

441

442 **Selection of physiological traits.** To reduce collinearity, we chose one trait in each  
 443 physiological trait dimension. We computed a correlation matrix of all the normalized  
 444 physiological traits (Fig. S8a) and enumerated all possible four-trait subsets. For each  
 445 subset, we calculated the Frobenius norm ( $\|\mathbf{A}\|_F$ ) of the correlation matrix ( $\mathbf{A}$ ),  
 446 according to equation (15).

$$447 \quad \mathbf{A} = \begin{bmatrix} a_{11} & \cdots & a_{1n} \\ \vdots & \ddots & \vdots \\ a_{m1} & \cdots & a_{mn} \end{bmatrix},$$

$$448 \quad \|\mathbf{A}\|_F = \sqrt{\sum_{i=1}^m \sum_{j=1}^n |a_{ij}|^2}. \quad (15)$$

449 Next, we found the optimal subset with the least Frobenius norm (Fig. S8b). The  
450 selected traits were  $CI_{re}$  (CHL),  $ARI1$  (ANT),  $PSRI$  (CAR), and  $NDII$  (WAT). We  
451 observed less collinearity among the selected traits except for CHL against WAT, where  
452 positive correlations are unavoidable because the process of photosynthesis is tightly  
453 linked to chlorophyll and water availability (Fig S9).

454

455 **Catchment data and distance buffers.** We used the digital elevation model (DEM) of the  
456 study area provided by the Swiss Federal Institute of Topography (Swisstopo) to extract  
457 the catchment of each eDNA sampling site. ArcGIS software (version 10.3) was used to  
458 generate a flow direction map based on the DEM. We produced a catchment map with  
459 flow distance for each site by tracing the water flow direction of each pixel and  
460 recording its flow distance to the site. Distance buffers of each sampling site were  
461 created by setting the spatial interval to 0.05 km for 0–10 km and 0.1 km for 10–20 km.

462

463 **Terrestrial ecosystem functional diversity across distance.** We chose functional  
464 divergence (FDiv) among three types of functional diversity (functional richness,  
465 functional divergence, and functional evenness) because FDiv best captured the  
466 variation of terrestrial ecosystem functions and was the most robust to noises and  
467 outliers<sup>22</sup>. For each sampling site with a distance buffer, based on the normalized  
468 selected traits, we extracted four-dimensional trait value vectors ( $V_i$ ) from vegetated  
469 pixels ( $i = 1, 2, \dots, s$ ) that covered by the distance buffer and calculated FDiv by following  
470 equations (16–19).

$$471 \quad C = \frac{1}{s} \sum_{i=1}^s V_i. \quad (16)$$

$$472 \quad dG_i = \|V_i - C\|_2. \quad (17)$$

$$473 \quad \Delta|d| = \frac{1}{s} \sum_{i=1}^s |dG_i - \overline{dG}|. \quad (18)$$

$$474 \quad \text{FDiv} = \frac{\overline{dG}}{\Delta|d| + \overline{dG}}. \quad (19)$$

475  $s$  is the number of vegetated pixels in the distance buffer;  $C$  is the center of gravity of all  
476 vectors;  $dG_i$  is the Euclidean distance between the vector of  $i^{\text{th}}$  pixel ( $V_i$ ) and the center  
477 of gravity ( $C$ ).  $\overline{dG}$  is the mean Euclidean distance of all vectors to the center of gravity  
478 ( $C$ ).

479

480 **Linear regression model and uncertainty estimation.** Due to uncertainties in both eDNA  
481 and RS measurements, we used a model II simple linear regression model to evaluate  
482 the correlation between Hill numbers and FDiv of surrounding terrestrial ecosystems  
483 across distance, using  $R^2$  as a metric. As distance increased, sampling sites were  
484 removed from the regression model if their catchments were already entirely covered  
485 by distance buffer (Fig. S10). To estimate uncertainties, we adopted a bootstrap  
486 framework by subsampling 70% of the available sampling sites 1,000 times, and then  
487 calculated the standard deviation of the bootstrapped  $R^2$  results.

488

489 **Null models for comparison.** We developed null models to ensure that the spatial  
490 association between aquatic and terrestrial ecosystems was not a measurement artifact.

491 Specifically, the spatial location of pixels (with their respective functional diversity  
492 measurement) within the river catchment were randomly shuffled in space 1,000 times,  
493 followed by calculating FDiv for each sampling site according to the same distance  
494 buffers generated before. Then, model II simple linear regression was performed to  
495 evaluate the correlation between the eDNA data and the shuffled RS data. We observed  
496 gradually increasing curves across Hill number orders without peaking signals (Fig. 5 and  
497 S11). These evidenced that the spatial fingerprint of biodiversity was a true signal from  
498 the spatial layout of the terrestrial ecosystem functional diversity, and was not an  
499 artifact.

500

501 **Evaluation of contributions of vegetation productivity and terrestrial ecosystem**  
502 **functional diversity.** We calculated the enhanced vegetation index (EVI, equation 20),  
503 which can be used to estimate vegetation productivity<sup>58,70</sup>. The EVI values were  
504 averaged across the distance buffers after excluding non-vegetated pixels.

$$\begin{aligned} 505 \quad EVI &= 2.5 \cdot \frac{\rho_{785-900} - \rho_{650-680}}{\rho_{785-900} + 6 \cdot \rho_{650-680} - 7.5 \cdot \rho_{458-523} + 1} \\ 506 \quad &= 2.5 \cdot \frac{B8 - B4}{B8 + 6 \cdot B4 - 7.5 \cdot B2 + 1} \end{aligned} \quad (20)$$

507 Then, we used linear models summarized in ANOVA tables with sequential (type  
508 I) tests to evaluate the relative contributions of EVI and FDiv to the Hill numbers (Hill)  
509 across distance, by equations (21–22).

$$510 \quad \text{Test 1: } ANOVA(\text{Hill} \sim EVI + FDiv + EVI \times FDiv). \quad (21)$$

$$511 \quad \text{Test 2: } ANOVA(\text{Hill} \sim FDiv + EVI + FDiv \times EVI). \quad (22)$$

512 *EVI* × *FDiv* and *FDiv* × *EVI* were interaction terms. The relative contributions of *EVI*  
513 and *FDiv* are shown in Fig. S5.

514

515

## 516 **Acknowledgements**

517 We thank Chelsea Little for support during fieldwork, Luca Carraro for help extracting  
518 catchment information, and Isabelle Helfenstein and Enrico Bertuzzo for their help with  
519 functional divergence computation. F.A. is funded by the Swiss National Science  
520 Foundation Grants No 31003A\_173074 and PP00P3\_179089, and F.A, F.M., and M.S. by  
521 the University of Zurich Research Priority Programme on Global Change and Biodiversity  
522 (URPP GCB).

## 523 References

- 524 1 Pimm, S. L. *et al.* The biodiversity of species and their rates of extinction, distribution,  
525 and protection. *Science* **344**, 1246752 (2014).
- 526 2 Kennedy, C. M., Oakleaf, J. R., Theobald, D. M., Baruch-Mordo, S. & Kiesecker, J.  
527 Managing the middle: A shift in conservation priorities based on the global human  
528 modification gradient. *Global Change Biology* **25**, 811-826 (2019).
- 529 3 Mittermeier, R. A., Turner, W. R., Larsen, F. W., Brooks, T. M. & Gascon, C. in *Biodiversity*  
530 *Hotspots Ch. 1*, 3-22 (Springer, Berlin, Heidelberg, 2011).
- 531 4 Hughes, A. C., Orr, M. C., Yang, Q. & Qiao, H. Effectively and accurately mapping global  
532 biodiversity patterns for different regions and taxa. *Global Ecology and Biogeography*  
533 (2021).
- 534 5 Oliver, T. H. *et al.* Biodiversity and resilience of ecosystem functions. *Trends in Ecology &*  
535 *Evolution* **30**, 673-684 (2015).
- 536 6 Isbell, F. *et al.* High plant diversity is needed to maintain ecosystem services. *Nature*  
537 **477**, 199-202 (2011).
- 538 7 Huang, Y. *et al.* Impacts of species richness on productivity in a large-scale subtropical  
539 forest experiment. *Science* **362**, 80-83 (2018).
- 540 8 Oehri, J., Schmid, B., Schaepman-Strub, G. & Niklaus, P. A. Terrestrial land-cover type  
541 richness is positively linked to landscape-level functioning. *Nature Communications* **11**,  
542 154 (2020).
- 543 9 Gonzalez, A. *et al.* Scaling-up biodiversity-ecosystem functioning research. *Ecology*  
544 *Letters* **23**, 757-776 (2020).
- 545 10 Thompson, P. L. *et al.* Scaling up biodiversity-ecosystem functioning relationships: the  
546 role of environmental heterogeneity in space and time. *Proceedings of the Royal Society*  
547 *B* **288**, 20202779 (2021).
- 548 11 Guichard, F. & Marleau, J. *Meta-Ecosystem Dynamics*. (Springer, Cham, 2021).
- 549 12 Gounand, I., Harvey, E., Little, C. J. & Altermatt, F. Meta-ecosystems 2.0: rooting the  
550 theory into the field. *Trends in Ecology & Evolution* **33**, 36-46 (2018).
- 551 13 Gounand, I., Little, C. J., Harvey, E. & Altermatt, F. Cross-ecosystem carbon flows  
552 connecting ecosystems worldwide. *Nature Communications* **9**, 4825 (2018).
- 553 14 Grimm, N. B. *et al.* Merging aquatic and terrestrial perspectives of nutrient  
554 biogeochemistry. *Oecologia* **137**, 485-501 (2003).
- 555 15 Vörösmarty, C. J. *et al.* Global threats to human water security and river biodiversity.  
556 *Nature* **467**, 555-561 (2010).
- 557 16 Dudgeon, D. Multiple threats imperil freshwater biodiversity in the Anthropocene.  
558 *Current Biology* **29**, R960-R967 (2019).
- 559 17 Rodriguez-Iturbe, I. & Rinaldo, A. *Fractal River Basins: Chance and Self-Organization*.  
560 (Cambridge University Press, Cambridge, 2001).
- 561 18 Carraro, L. *et al.* Generation and application of river network analogues for use in  
562 ecology and evolution. *Ecology and Evolution* **10**, 7537-7550 (2020).
- 563 19 Pereira, H. M. *et al.* Essential biodiversity variables. *Science* **339**, 277-278 (2013).



- 564 20 Skidmore, A. K. *et al.* Priority list of biodiversity metrics to observe from space. *Nature Ecology & Evolution* **5**, 896-906 (2021).  
565
- 566 21 O'Connor, B., Bojinski, S., Rösli, C. & Schapman, M. E. Monitoring global changes in  
567 biodiversity and climate essential as ecological crisis intensifies. *Ecological Informatics*  
568 **55**, 101033 (2020).
- 569 22 Schneider, F. D. *et al.* Mapping functional diversity from remotely sensed morphological  
570 and physiological forest traits. *Nature Communications* **8**, 1441 (2017).
- 571 23 Zheng, Z. *et al.* Mapping functional diversity using individual tree-based morphological  
572 and physiological traits in a subtropical forest. *Remote Sensing of Environment* **252**,  
573 112170 (2020).
- 574 24 Guillén-Escribà, C. *et al.* Remotely sensed between-individual functional trait variation  
575 in a temperate forest. *Ecology and Evolution* **11**, 10834-10867 (2021).
- 576 25 Jetz, W. *et al.* Monitoring plant functional diversity from space. *Nature Plants* **2**, 16024  
577 (2016).
- 578 26 Lodge, D. M. *et al.* Conservation in a cup of water: estimating biodiversity and  
579 population abundance from environmental DNA. *Molecular Ecology* **21**, 2555-2558  
580 (2012).
- 581 27 Thomsen, P. F. & Willerslev, E. Environmental DNA—An emerging tool in conservation for  
582 monitoring past and present biodiversity. *Biological Conservation* **183**, 4-18 (2015).
- 583 28 Pawlowski, J., Apothéoz-Perret-Gentil, L. & Altermatt, F. Environmental DNA: What's  
584 behind the term? Clarifying the terminology and recommendations for its future use in  
585 biomonitoring. *Molecular Ecology* **29**, 4258-4264 (2020).
- 586 29 Taberlet, P., Coissac, E., Pompanon, F., Brochmann, C. & Willerslev, E. Towards next-  
587 generation biodiversity assessment using DNA metabarcoding. *Molecular Ecology* **21**,  
588 2045-2050 (2012).
- 589 30 Cilleros, K. *et al.* Unlocking biodiversity and conservation studies in high-diversity  
590 environments using environmental DNA (eDNA): A test with Guianese freshwater fishes.  
591 *Molecular Ecology Resources* **19**, 27-46 (2019).
- 592 31 Turak, E. *et al.* Essential Biodiversity Variables for measuring change in global freshwater  
593 biodiversity. *Biological Conservation* **213**, 272-279 (2017).
- 594 32 Deiner, K. *et al.* Environmental DNA metabarcoding: Transforming how we survey  
595 animal and plant communities. *Molecular Ecology* **26**, 5872-5895 (2017).
- 596 33 Bohmann, K. *et al.* Environmental DNA for wildlife biology and biodiversity monitoring.  
597 *Trends in Ecology & Evolution* **29**, 358-367 (2014).
- 598 34 Djurhuus, A. *et al.* Environmental DNA reveals seasonal shifts and potential interactions  
599 in a marine community. *Nature Communications* **11**, 254 (2020).
- 600 35 Bista, I. *et al.* Annual time-series analysis of aqueous eDNA reveals ecologically relevant  
601 dynamics of lake ecosystem biodiversity. *Nature Communications* **8**, 14087 (2017).
- 602 36 Cantera, I. *et al.* Optimizing environmental DNA sampling effort for fish inventories in  
603 tropical streams and rivers. *Scientific Reports* **9**, 3085 (2019).
- 604 37 Deiner, K., Fronhofer, E. A., Mächler, E., Walser, J.-C. & Altermatt, F. Environmental DNA  
605 reveals that rivers are conveyor belts of biodiversity information. *Nature*  
606 *Communications* **7**, 12544 (2016).

- 607 38 Deiner, K. & Altermatt, F. Transport distance of invertebrate environmental DNA in a  
608 natural river. *PLoS ONE* **9**, e88786 (2014).
- 609 39 Shogren, A. J. *et al.* Controls on eDNA movement in streams: Transport, Retention, and  
610 Resuspension. *Scientific Reports* **7**, 5065 (2017).
- 611 40 Pont, D. *et al.* Environmental DNA reveals quantitative patterns of fish biodiversity in  
612 large rivers despite its downstream transportation. *Scientific Reports* **8**, 10361 (2018).
- 613 41 Carraro, L., Mächler, E., Wüthrich, R. & Altermatt, F. Environmental DNA allows  
614 upscaling spatial patterns of biodiversity in freshwater ecosystems. *Nature*  
615 *Communications* **11**, 3585 (2020).
- 616 42 Shackleton, M., Rees, G. N., Watson, G., Campbell, C. & Nielsen, D. Environmental DNA  
617 reveals landscape mosaic of wetland plant communities. *Global Ecology and*  
618 *Conservation* **19**, e00689 (2019).
- 619 43 Yamasaki, E. *et al.* Genomics meets remote sensing in global change studies: monitoring  
620 and predicting phenology, evolution and biodiversity. *Current Opinion in Environmental*  
621 *Sustainability* **29**, 177-186 (2017).
- 622 44 Lausch, A. *et al.* Understanding and assessing vegetation health by in situ species and  
623 remote-sensing approaches. *Methods in Ecology and Evolution* **9**, 1799-1809 (2018).
- 624 45 Lin, M. *et al.* Landscape analyses using eDNA metabarcoding and Earth observation  
625 predict community biodiversity in California. *Ecological Applications* **31**, e02379 (2021).
- 626 46 Bush, A. *et al.* Connecting Earth observation to high-throughput biodiversity data.  
627 *Nature Ecology & Evolution* **1**, 0176 (2017).
- 628 47 Mächler, E. *et al.* Assessing different components of diversity across a river network  
629 using eDNA. *Environmental DNA* **1**, 290-301 (2019).
- 630 48 Mächler, E., Walser, J.-C. & Altermatt, F. Decision-making and best practices for  
631 taxonomy-free environmental DNA metabarcoding in biomonitoring using Hill numbers.  
632 *Molecular Ecology* **30**, 3326-3339 (2021).
- 633 49 Jost, L. Partitioning diversity into independent alpha and beta components. *Ecology* **88**,  
634 2427-2439 (2007).
- 635 50 Alberdi, A. & Gilbert, M. T. P. A guide to the application of Hill numbers to DNA-based  
636 diversity analyses. *Molecular Ecology Resources* **19**, 804-817 (2019).
- 637 51 Hill, M. O. Diversity and evenness: a unifying notation and its consequences. *Ecology* **54**,  
638 427-432 (1973).
- 639 52 Helfenstein, I. *Functional Diversity from Physiological Forest Traits Across Different*  
640 *Spatial Scales and Optical Sensors: Attempts of Mapping Biodiversity from Space* Master  
641 thesis, University of Zurich, (2018).
- 642 53 Drusch, M. *et al.* Sentinel-2: ESA's optical high-resolution mission for GMES operational  
643 services. *Remote Sensing of Environment* **120**, 25-36 (2012).
- 644 54 Fahey, R. T. *et al.* Defining a spectrum of integrative trait-based vegetation canopy  
645 structural types. *Ecology Letters* **22**, 2049-2059 (2019).
- 646 55 Kraft, N. J. *et al.* Disentangling the drivers of  $\beta$  diversity along latitudinal and elevational  
647 gradients. *Science* **333**, 1755-1758 (2011).
- 648 56 Blowes, S. A. *et al.* The geography of biodiversity change in marine and terrestrial  
649 assemblages. *Science* **366**, 339-345 (2019).

- 650 57 Weigand, H. *et al.* DNA barcode reference libraries for the monitoring of aquatic biota in  
651 Europe: Gap-analysis and recommendations for future work. *Science of the Total*  
652 *Environment* **678**, 499-524 (2019).
- 653 58 Jiang, Z., Huete, A. R., Didan, K. & Miura, T. Development of a two-band enhanced  
654 vegetation index without a blue band. *Remote Sensing of Environment* **112**, 3833-3845  
655 (2008).
- 656 59 Skidmore, A. K. *et al.* Agree on biodiversity metrics to track from space: Ecologists and  
657 space agencies must forge a global monitoring strategy. *Nature* **523**, 403-406 (2015).
- 658 60 Kissling, W. D. *et al.* Building essential biodiversity variables (EBVs) of species  
659 distribution and abundance at a global scale. *Biological Reviews* **93**, 600-625 (2018).
- 660 61 Kelly, R. P. *et al.* Harnessing DNA to improve environmental management. *Science* **344**,  
661 1455-1456 (2014).
- 662 62 Valentini, A. *et al.* Next-generation monitoring of aquatic biodiversity using  
663 environmental DNA metabarcoding. *Molecular Ecology* **25**, 929-942 (2016).
- 664 63 Williams, L. J. *et al.* Remote spectral detection of biodiversity effects on forest biomass.  
665 *Nature Ecology & Evolution* **5**, 46-54 (2021).
- 666 64 Bohan, D. A. *et al.* Next-generation global biomonitoring: large-scale, automated  
667 reconstruction of ecological networks. *Trends in Ecology & Evolution* **32**, 477-487 (2017).
- 668 65 De Souza, L. S., Godwin, J. C., Renshaw, M. A. & Larson, E. Environmental DNA (eDNA)  
669 detection probability is influenced by seasonal activity of organisms. *PLoS ONE* **11**,  
670 e0165273 (2016).
- 671 66 Bolton, D. K. *et al.* Continental-scale land surface phenology from harmonized Landsat 8  
672 and Sentinel-2 imagery. *Remote Sensing of Environment* **240**, 111685 (2020).
- 673 67 Leray, M. *et al.* A new versatile primer set targeting a short fragment of the  
674 mitochondrial COI region for metabarcoding metazoan diversity: application for  
675 characterizing coral reef fish gut contents. *Frontiers in Zoology* **10**, 34 (2013).
- 676 68 Andrews, S. FastQC: a quality control tool for high throughput sequence data.  
677 Babraham Institute. Available online at  
678 <https://www.bioinformatics.babraham.ac.uk/projects/fastqc/> (2010).
- 679 69 Gorelick, N. *et al.* Google Earth Engine: Planetary-scale geospatial analysis for everyone.  
680 *Remote Sensing of Environment* **202**, 18-27 (2017).
- 681 70 Sims, D. A. *et al.* On the use of MODIS EVI to assess gross primary productivity of North  
682 American ecosystems. *Journal of Geophysical Research: Biogeosciences* **111**, G04015  
683 (2006).
- 684
